# Supplementary material for: Evolution and mutations predisposing to daptomycin resistance in vancomycin-resistant Enterococcus faecium ST736 strains
Source: PubMed Central journal article supplement (PMC6303062; doi:10.1371/journal.pone.0209785), 2018-12-21

**Evolution and Mutations Predisposing to Daptomycin Resistance in Vancomycin-Resistant *Enterococcus faecium* ST736 Strains**

Guiqing Wang<sup>1,5,\*</sup>, Fan Yu<sup>2</sup>, Henry Lin<sup>2</sup>, Karthikeyan Murugesan<sup>2</sup>, Weihua Huang<sup>1</sup>, Andrew G. Hoss<sup>2</sup>, Abhay Dhand<sup>3</sup>, Leslie Y. Lee<sup>4</sup>, Jian Zhuge<sup>5</sup>, Changhong Yin<sup>1</sup>, Marisa Montecalvo<sup>3</sup>, Nevenka Dimitrova<sup>2</sup>, and John T. Fallon<sup>1,5</sup>

**Supplemental information**

**Table A. Distribution of clonality among *E. faecium* clinical isolates (1995-2013)<sup>a</sup>**

| Year      | Total no. of isolates | MSLT sequence type (no. of isolates, %) |           |           |            |                            |
|-----------|-----------------------|-----------------------------------------|-----------|-----------|------------|----------------------------|
|           |                       | ST17                                    | ST18      | ST412     | ST736      | Miscellaneous <sup>b</sup> |
| 1994-1995 | 43                    | 33 (76.7)                               | 3 (7.0)   | 0         | 0          | 7 (16.3)                   |
| 2009      | 20                    | 0                                       | 2 (10.0)  | 2 (10.0)  | 9 (45.0)   | 7 (35.0)                   |
| 2010      | 30                    | 0                                       | 1 (3.3)   | 6 (20.0)  | 16 (53.3)  | 7 (23.3)                   |
| 2011      | 30                    | 0                                       | 2 (6.7)   | 3 (10.0)  | 23 (76.7)  | 2 (6.7)                    |
| 2012      | 35                    | 0                                       | 6 (17.1)  | 5 (14.3)  | 20 (57.1)  | 4 (11.4)                   |
| 2013      | 92                    | 0                                       | 24 (26.1) | 19 (20.7) | 43 (46.7)  | 6 (6.3)                    |
| Total     | 250                   | 33 (13.2)                               | 38 (15.2) | 35 (14.0) | 111 (44.1) | 33 (13.2)                  |

<sup>a</sup> *E. faecium* isolates from 2009 to 2012 are not randomly selected; selective bias may be existed.

<sup>b</sup> Miscellaneous ST for 1994-1995 isolates: ST16 (n = 2), ST20 (1), ST186 (1), ST280 (1) and ST535 (2); for 2009 isolates: ST203 (1), ST282 (4), ST750 (1) and one new ST (1); for 2010 isolates: ST282 (1), ST750 (2), ST893 (1), ST894 (1) and ST896 (1) and ST1314; for 2011 isolates: ST656 (1) and ST896 (1); for 2012 isolates: ST32 (1), ST214 (1), ST584 (1) and ST664 (1); for 2013 isolates: ST117 (2), ST448 (1), ST749 (1), ST895 (1), and ST896 (1). See supplemental table S1 for details.

**Table B. Clinical, microbiological and mutation of the *liaFSR* and *cls* genes of daptomycin-nonsusceptible *E. faecium* isolates**

| <i>E. faecium</i> group | Year | Isolate | Source           | MLST sequence type (ST) | Vancomycin MIC (µg/mL) | <i>van</i> gene | Daptomycin MIC (µg/mL) | <i>liaR</i> .W73C | <i>liaS</i> .T120A | <i>cls</i> .N131 | <i>cls</i> .N13S | <i>cls</i> .N13T | <i>cls</i> .A20D | <i>cls</i> .H215R | <i>cls</i> .R218Q | Average depth of Coverage |
|-------------------------|------|---------|------------------|-------------------------|------------------------|-----------------|------------------------|-------------------|--------------------|------------------|------------------|------------------|------------------|-------------------|-------------------|---------------------------|
| ST736 (n=38)            | 2009 | E39     | Blood            | 736                     | >16                    | <i>vanA</i>     | 96                     | 1                 | 1                  | 0                | 0                | 1                | 0                | 0                 | 0                 | 460.0                     |
|                         | 2010 | E13     | Blood            | 736                     | 1                      | -               | 32                     | 1                 | 1                  | 0                | 0                | 0                | 0                | 0                 | 0                 | 86.6                      |
|                         | 2010 | E14     | Blood            | 736                     | >16                    | <i>vanA</i>     | 16                     | 1                 | 1                  | 0                | 0                | 0                | 0                | 0                 | 0                 | 66.2                      |
|                         | 2010 | E17     | Wound            | 736                     | >16                    | <i>vanA</i>     | 16                     | 1                 | 1                  | 0                | 0                | 1                | 0                | 0                 | 0                 | 68.2                      |
|                         | 2010 | E34     | Urine            | 736                     | >16                    | <i>vanA</i>     | 48                     | 1                 | 1                  | 0                | 0                | 1                | 0                | 0                 | 0                 | 21.6                      |
|                         | 2010 | E53     | Wound            | 736                     | >16                    | <i>vanA</i>     | 64                     | 1                 | 1                  | 0                | 0                | 1                | 0                | 0                 | 0                 | 37.2                      |
|                         | 2011 | E146    | Urine            | 736                     | >16                    | <i>vanA</i>     | 32                     | 1                 | 1                  | 1                | 0                | 0                | 0                | 0                 | 0                 | 17.4                      |
|                         | 2011 | E370    | Blood            | 736                     | >16                    | <i>vanA</i>     | 16                     | 1                 | 1                  | 0                | 0                | 0                | 1                | 0                 | 0                 | 59.9                      |
|                         | 2011 | E371    | Blood            | 736                     | >16                    | <i>vanA</i>     | 8                      | 1                 | 1                  | 0                | 0                | 0                | 0                | 1                 | 0                 | 84.7                      |
|                         | 2011 | E372    | Blood            | 736                     | >16                    | <i>vanA</i>     | 16                     | 1                 | 1                  | 0                | 0                | 0                | 0                | 1                 | 0                 | 50.3                      |
|                         | 2011 | E480    | Urine            | 736                     | 1                      | -               | 8                      | 1                 | 1                  | 0                | 0                | 0                | 0                | 0                 | 1                 | 35.8                      |
|                         | 2011 | E91     | Blood            | 736                     | >16                    | <i>vanA</i>     | 64                     | 1                 | 1                  | 0                | 0                | 1                | 0                | 0                 | 0                 | 24.4                      |
|                         | 2012 | E165    | Urine            | 736                     | >16                    | <i>vanA</i>     | 16                     | 1                 | 1                  | 0                | 0                | 0                | 0                | 0                 | 0                 | 16.1                      |
|                         | 2012 | E166    | Urine            | 736                     | 2                      | -               | 8                      | 1                 | 1                  | 0                | 0                | 0                | 0                | 0                 | 0                 | 37.3                      |
|                         | 2012 | E168    | Urine            | 736                     | >16                    | <i>vanA</i>     | 32                     | 1                 | 1                  | 0                | 0                | 0                | 0                | 0                 | 0                 | 33.3                      |
|                         | 2012 | E173    | Wound            | 736                     | >16                    | <i>vanA</i>     | 32                     | 1                 | 1                  | 0                | 0                | 0                | 0                | 0                 | 0                 | 74.7                      |
|                         | 2012 | E390    | Wound            | 736                     | >16                    | <i>vanA</i>     | 8                      | 1                 | 1                  | 0                | 0                | 0                | 0                | 1                 | 0                 | 67.2                      |
|                         | 2012 | E395    | Blood            | 736                     | >16                    | <i>vanA</i>     | 6                      | 1                 | 1                  | 0                | 0                | 0                | 0                | 0                 | 0                 | 95.0                      |
|                         | 2013 | E175    | Urine            | 736                     | >16                    | <i>vanA</i>     | 8                      | 1                 | 1                  | 0                | 0                | 0                | 0                | 0                 | 0                 | 15.6                      |
|                         | 2013 | E203    | Blood            | 736                     | >16                    | <i>vanA</i>     | 8                      | 1                 | 1                  | 0                | 0                | 0                | 0                | 0                 | 0                 | 46.7                      |
|                         | 2013 | E207    | Urine            | 736                     | >16                    | <i>vanA</i>     | 12                     | 1                 | 1                  | 0                | 0                | 0                | 0                | 0                 | 0                 | 40.8                      |
|                         | 2013 | E208    | Peritoneal fluid | 736                     | >16                    | <i>vanA</i>     | 6                      | 1                 | 1                  | 0                | 0                | 0                | 0                | 0                 | 0                 | 21.3                      |
|                         | 2013 | E218    | Urine            | 736                     | >16                    | <i>vanA</i>     | 8                      | 1                 | 1                  | 0                | 0                | 0                | 0                | 0                 | 0                 | 87.0                      |
|                         | 2013 | E222    | Urine            | 736                     | >16                    | <i>vanA</i>     | 8                      | 1                 | 1                  | 0                | 0                | 0                | 0                | 0                 | 0                 | 41.3                      |
|                         | 2013 | E225    | Blood            | 736                     | >16                    | <i>vanA</i>     | 6                      | 1                 | 1                  | 0                | 0                | 0                | 0                | 0                 | 0                 | 67.6                      |
|                         | 2013 | E226    | Peritoneal fluid | 736                     | >16                    | <i>vanA</i>     | 6                      | 1                 | 1                  | 0                | 0                | 0                | 0                | 0                 | 0                 | 48.7                      |
|                         | 2013 | E231    | Wound            | 736                     | >16                    | <i>vanA</i>     | 6                      | 1                 | 1                  | 0                | 0                | 0                | 0                | 0                 | 0                 | 64.9                      |
|                         | 2013 | E236    | SITE             | 736                     | >16                    | <i>vanA</i>     | 6                      | 1                 | 1                  | 0                | 0                | 0                | 0                | 0                 | 0                 | 86.6                      |
|                         | 2013 | E237    | Blood            | 736                     | >16                    | <i>vanA</i>     | 8                      | 1                 | 1                  | 0                | 0                | 0                | 0                | 0                 | 0                 | 62.4                      |
|                         | 2013 | E242    | Wound            | 736                     | >16                    | <i>vanA</i>     | 8                      | 1                 | 1                  | 0                | 0                | 0                | 0                | 0                 | 0                 | 67.8                      |
|                         | 2013 | E243    | Peritoneal fluid | 736                     | >16                    | <i>vanA</i>     | >256                   | 1                 | 1                  | 0                | 0                | 0                | 0                | 0                 | 0                 | 51.8                      |
|                         | 2013 | E249    | Blood            | 736                     | >16                    | <i>vanA</i>     | 8                      | 1                 | 1                  | 0                | 0                | 0                | 0                | 0                 | 0                 | 103.5                     |
|                         | 2013 | E251    | Urine            | 736                     | >16                    | <i>vanA</i>     | 6                      | 1                 | 1                  | 0                | 0                | 0                | 0                | 0                 | 0                 | 68.9                      |
|                         | 2013 | E253    | Wound            | 736                     | >16                    | <i>vanA</i>     | >256                   | 1                 | 1                  | 0                | 0                | 0                | 1                | 0                 | 0                 | 131.2                     |
|                         | 2013 | E261    | Urine            | 736                     | >16                    | <i>vanA</i>     | 8                      | 1                 | 1                  | 0                | 0                | 0                | 0                | 0                 | 0                 | 36.1                      |
|                         | 2013 | E284    | Urine            | 736                     | >16                    | <i>vanA</i>     | 6                      | 1                 | 1                  | 0                | 0                | 0                | 0                | 0                 | 0                 | 14.0                      |
|                         | 2013 | E347    | Blood            | 736                     | >16                    | <i>vanA</i>     | 8                      | 1                 | 1                  | 0                | 0                | 0                | 0                | 0                 | 0                 | 31.3                      |
|                         | 2013 | E356    | Blood            | 736                     | >16                    | <i>vanA</i>     | 32                     | 1                 | 1                  | 0                | 1                | 0                | 0                | 0                 | 0                 | 31.7                      |
| Non-ST736 (n=15)        | 2009 | E7      | Urine            | 18                      | 1                      | -               | 16                     | 0                 | 0                  | 1                | 0                | 0                | 0                | 0                 | 0                 | 74.1                      |
|                         | 2009 | E8      | Urine            | 282                     | >16                    | <i>vanA</i>     | 16                     | 0                 | 0                  | 0                | 0                | 0                | 0                | 0                 | 0                 | 30.0                      |
|                         | 2009 | E49     | Blood            | 750                     | ≤2                     | -               | 16                     | 0                 | 0                  | 0                | 0                | 0                | 0                | 0                 | 1                 | 25.9                      |
|                         | 2010 | E50     | Blood            | 412                     | >16                    | <i>vanA</i>     | 64                     | 0                 | 0                  | 0                | 0                | 0                | 0                | 0                 | 0                 | 41.3                      |
|                         | 2010 | E20     | Wound            | 893                     | 2                      | -               | 6                      | 1                 | 1                  | 0                | 0                | 0                | 0                | 0                 | 0                 | 71.7                      |
|                         | 2010 | E451    | Urine            | 896                     | >16                    | <i>vanA</i>     | 6                      | 0                 | 0                  | 0                | 0                | 0                | 0                | 0                 | 0                 | 47.2                      |
|                         | 2011 | E376    | Blood            | 656                     | >16                    | <i>vanA</i>     | 12                     | 1                 | 1                  | 0                | 0                | 0                | 0                | 1                 | 0                 | 65.2                      |
|                         | 2011 | E367    | Blood            | 896                     | >16                    | <i>vanA</i>     | 6                      | 0                 | 0                  | 0                | 0                | 0                | 0                | 0                 | 0                 | 67.0                      |
|                         | 2012 | E392    | Urine            | 214                     | 1                      | -               | 6                      | 0                 | 0                  | 0                | 0                | 0                | 0                | 0                 | 0                 | 32.0                      |
|                         | 2013 | E233    | Urine            | 18                      | >16                    | <i>vanA</i>     | 6                      | 0                 | 0                  | 0                | 0                | 0                | 0                | 0                 | 0                 | 39.8                      |
|                         | 2013 | E245    | Urine            | 18                      | >16                    | <i>vanA</i>     | 12                     | 0                 | 0                  | 0                | 0                | 0                | 0                | 0                 | 0                 | 112.7                     |
|                         | 2013 | E325    | Blood            | 18                      | >16                    | <i>vanA</i>     | 8                      | 1                 | 1                  | 0                | 0                | 0                | 0                | 0                 | 0                 | 16.8                      |
|                         | 2013 | E174    | Urine            | 412                     | >16                    | <i>vanA</i>     | 12                     | 0                 | 0                  | 0                | 0                | 0                | 0                | 0                 | 0                 | 28.4                      |
|                         | 2013 | E302    | Peritoneal fluid | 412                     | >16                    | <i>vanA</i>     | 8                      | 0                 | 0                  | 0                | 0                | 0                | 0                | 0                 | 0                 | 61.2                      |
|                         | 2013 | E354    | Blood            | 412                     | >16                    | <i>vanA</i>     | 16                     | 1                 | 1                  | 0                | 0                | 0                | 0                | 0                 | 0                 | 14.3                      |

**Table C. Distribution of daptomycin MICs of dominant VREfm clones for each time period of evaluation**

| Year      | MLST<br>ST | No. of<br>isolates | MIC ( $\mu\text{g/mL}$ ) |   |    |    |    |    |    |     |            |   |
|-----------|------------|--------------------|--------------------------|---|----|----|----|----|----|-----|------------|---|
|           |            |                    | $\leq 2$                 | 3 | 4  | 8  | 16 | 32 | 64 | 128 | $\geq 256$ |   |
| 1994-1995 | ST17       | 33                 | 1                        | 1 | 31 |    |    |    |    |     |            |   |
|           | ST18       | 3                  | 2                        | 0 | 1  |    |    |    |    |     |            |   |
| 2009-2012 | ST18       | 11                 | 1                        | 1 | 9  |    |    |    |    |     |            |   |
|           | ST412      | 16                 | 5                        | 4 | 6  |    |    |    |    | 1   |            |   |
|           | ST736      | 69                 | 8                        | 8 | 37 | 5  | 5  | 4  | 2  | 1   |            |   |
| 2013      | ST18       | 24                 | 4                        | 5 | 13 | 2  | 1  |    |    |     |            |   |
|           | ST412      | 19                 | 5                        | 3 | 8  | 1  | 2  |    |    |     |            |   |
|           | ST736      | 43                 | 5                        | 4 | 14 | 16 | 1  | 1  |    |     |            | 2 |

Figure A

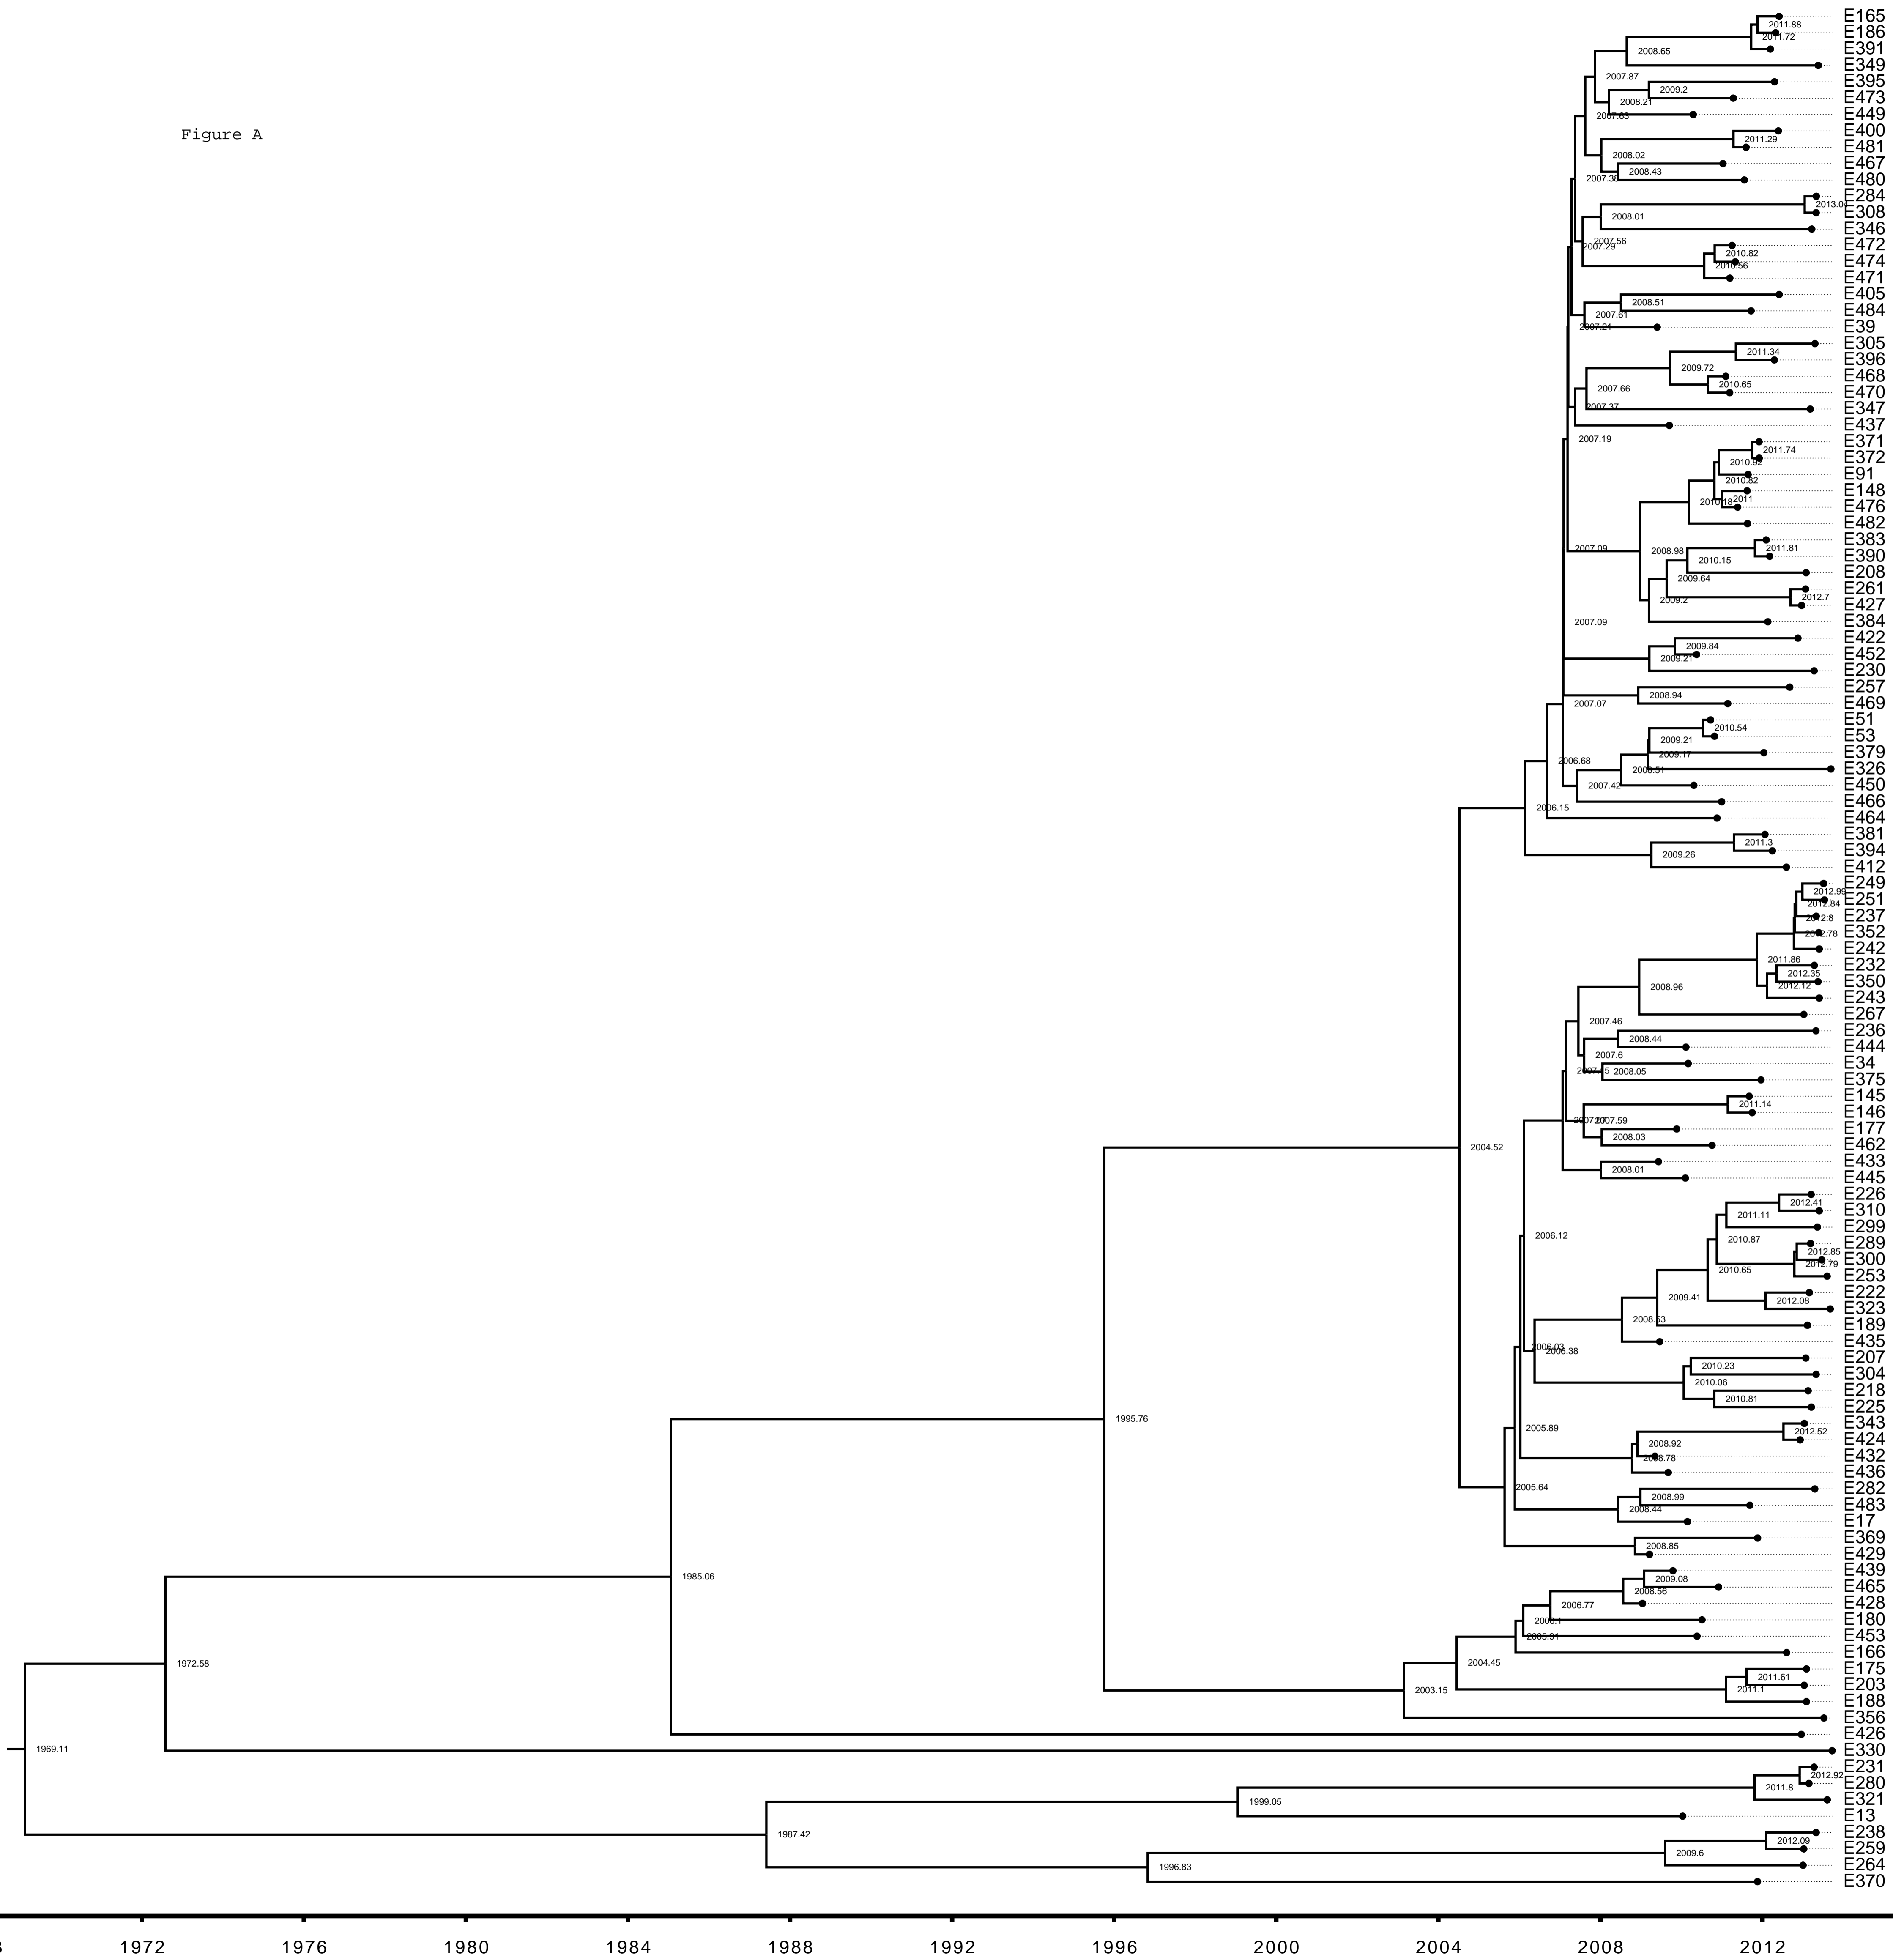

Supplement: pone.0209785.s001.pdf [file pone.0209785.s001.pdf]
